# Supplementary material for: Reconstructed Skin Models Revealed Unexpected Differences in Epidermal African and Caucasian Skin
Source: PubMed Central journal article supplement (PMC6520399; doi:10.1038/s41598-019-43128-3), 2019-05-15
Supplement: 41598_2019_43128_MOESM1_ESM.pdf [file 41598_2019_43128_MOESM1_ESM.pdf]

**RECONSTRUCTED SKIN MODELS REVEALED UNEXPECTED  
DIFFERENCES IN EPIDERMAL AFRICAN AND CAUCASIAN  
SKIN**

Sarah GIRARDEAU-HUBERT, Céline DENEUVILLE, Hervé PAGEON, Kahina ABED,  
Charlotte TACHEAU, Nükhet CAVUSOGLU, Mark DONOVAN, Dominique BERNARD  
and Daniel ASSELINEAU

**Supplementary Information**

**a**

| <b>Official symbol</b> | <b>Official full name</b>                                              | <b>EntrezID</b> | <b>Pseudo Fc</b> | <b>Adjusted p-value</b> |
|------------------------|------------------------------------------------------------------------|-----------------|------------------|-------------------------|
| SLC44A5                | solute carrier family 44, member 5                                     | 204962          | 5,7              | 1,1E-05                 |
| CH25H                  | cholesterol 25-hydroxylase                                             | 9023            | 2,9              | 1,3E-02                 |
| PTH2R                  | parathyroid hormone 2 receptor                                         | 5746            | 2,8              | 4,0E-03                 |
| FAR2                   | fatty acyl CoA reductase 2                                             | 55711           | 2,6              | 1,1E-02                 |
| KANSL1-AS1             | KANSL1 antisense RNA 1                                                 | 644246          | 2,5              | 1,1E-05                 |
| HTATSF1P2              | HIV-1 Tat specific factor 1 pseudogene 2                               | 401233          | 2,5              | 1,3E-02                 |
| AADAC                  | arylacetamide deacetylase                                              | 13              | 2,4              | 8,8E-03                 |
| ALDH3B2                | aldehyde dehydrogenase 3 family, member B2                             | 222             | 2,4              | 1,9E-02                 |
| LOC100506102           | uncharacterized LOC100506102                                           | 100506102       | 2,3              | 4,5E-02                 |
| ELOVL3                 | ELOVL fatty acid elongase 3                                            | 83401           | 2,2              | 1,2E-02                 |
| BLMH                   | bleomycin hydrolase                                                    | 642             | 2,2              | 3,4E-02                 |
| ALOX12                 | arachidonate 12-lipoxygenase                                           | 239             | 2,2              | 3,7E-03                 |
| SLC46A2                | solute carrier family 46, member 2                                     | 57864           | 2,1              | 1,4E-02                 |
| LY6K                   | lymphocyte antigen 6 complex, locus K                                  | 54742           | 2,1              | 5,7E-03                 |
| MMP3                   | matrix metalloproteinase 3 (stromelysin 1, progelatinase)              | 4314            | 2,1              | 1,3E-02                 |
| GDA                    | guanine deaminase                                                      | 9615            | 2,1              | 1,5E-03                 |
| STK19                  | serine/threonine kinase 19                                             | 8859            | 2,0              | 2,0E-03                 |
| DUSP2                  | dual specificity phosphatase 2                                         | 1844            | 2,0              | 3,5E-03                 |
| CHI3L1                 | chitinase 3-like 1 (cartilage glycoprotein-39)                         | 1116            | 1,9              | 3,8E-02                 |
| CSNK2A2                | casein kinase 2, alpha prime polypeptide                               | 1459            | 1,9              | 1,9E-02                 |
| AADACL2                | arylacetamide deacetylase-like 2                                       | 344752          | 1,9              | 1,1E-02                 |
| LRMP                   | lymphoid-restricted membrane protein                                   | 4033            | 1,9              | 3,9E-02                 |
| CCDC113                | coiled-coil domain containing 113                                      | 29070           | 1,9              | 8,1E-03                 |
| HAL                    | histidine ammonia-lyase                                                | 3034            | 1,9              | 1,2E-02                 |
| EREG                   | epiregulin                                                             | 2069            | 1,9              | 1,5E-04                 |
| EGR2                   | early growth response 2                                                | 1959            | 1,8              | 3,3E-03                 |
| ABHD12B                | abhydrolase domain containing 12B                                      | 145447          | 1,8              | 4,8E-02                 |
| SPTSSB                 | serine palmitoyltransferase, small subunit B                           | 165679          | 1,8              | 1,4E-03                 |
| ID4                    | inhibitor of DNA binding 4, dominant negative helix-loop-helix protein | 3400            | 1,8              | 3,4E-02                 |
| DHRS4-AS1              | DHRS4 antisense RNA 1                                                  | 55449           | 1,8              | 7,2E-04                 |
| KCNK7                  | potassium channel, subfamily K, member 7                               | 10089           | 1,8              | 5,6E-03                 |
| AQP9                   | aquaporin 9                                                            | 366             | 1,8              | 1,0E-03                 |
| APCDD1                 | adenomatosis polyposis coli down-regulated 1                           | 147495          | 1,8              | 1,2E-02                 |
| CYP2E1                 | cytochrome P450, family 2, subfamily E, polypeptide 1                  | 1571            | 1,8              | 1,4E-02                 |
| TCEA3                  | transcription elongation factor A (SII), 3                             | 6920            | 1,8              | 3,2E-02                 |
| RBMXL1                 | RNA binding motif protein, X-linked-like 1                             | 494115          | 1,8              | 8,7E-03                 |
| NUDT4                  | nudix (nucleoside diphosphate linked moiety X)-type motif 4            | 11163           | 1,8              | 1,1E-05                 |
| KCNJ2                  | potassium inwardly-rectifying channel, subfamily J, member 2           | 3759            | 1,8              | 4,2E-03                 |
| GLRX                   | glutaredoxin (thioltransferase)                                        | 2745            | 1,8              | 3,2E-02                 |
| RPS23                  | ribosomal protein S23                                                  | 6228            | 1,8              | 8,6E-04                 |
| KLK9                   | kallikrein-related peptidase 9                                         | 284366          | 1,8              | 7,2E-03                 |
| SLC26A9                | solute carrier family 26 (anion exchanger), member 9                   | 115019          | 1,7              | 3,4E-03                 |

|          |                                                                                          |        |     |         |
|----------|------------------------------------------------------------------------------------------|--------|-----|---------|
| RASIP1   | Ras interacting protein 1                                                                | 54922  | 1,7 | 4,2E-03 |
| ACPP     | acid phosphatase, prostate                                                               | 55     | 1,7 | 1,8E-02 |
| SLC5A1   | solute carrier family 5 (sodium/glucose cotransporter), member 1                         | 6523   | 1,7 | 3,3E-05 |
| GAN      | gigaxonin                                                                                | 8139   | 1,7 | 1,5E-02 |
| PTPN21   | protein tyrosine phosphatase, non-receptor type 21                                       | 11099  | 1,7 | 3,4E-03 |
| SMIM5    | small integral membrane protein 5                                                        | 643008 | 1,7 | 1,5E-02 |
| SLC45A4  | solute carrier family 45, member 4                                                       | 57210  | 1,7 | 3,9E-02 |
| HOXB2    | homeobox B2                                                                              | 3212   | 1,7 | 3,6E-03 |
| EGR3     | early growth response 3                                                                  | 1960   | 1,7 | 6,5E-03 |
| SYTL2    | synaptotagmin-like 2                                                                     | 54843  | 1,7 | 2,5E-02 |
| LGALS8   | lectin, galactoside-binding, soluble, 8                                                  | 3964   | 1,7 | 1,0E-02 |
| ADTRP    | androgen-dependent TFPI-regulating protein                                               | 84830  | 1,7 | 3,1E-03 |
| NA       | #N/A                                                                                     | #N/A   | 1,7 | 3,5E-03 |
| ELOVL7   | ELOVL fatty acid elongase 7                                                              | 79993  | 1,7 | 7,5E-03 |
| RDH12    | retinol dehydrogenase 12 (all-trans/9-cis/11-cis)                                        | 145226 | 1,6 | 1,3E-03 |
| ARIH1    | ariadne homolog, ubiquitin-conjugating enzyme E2 binding protein, 1 (Drosophila)         | 25820  | 1,6 | 7,4E-03 |
| ZNF662   | zinc finger protein 662                                                                  | 389114 | 1,6 | 4,2E-03 |
| RORA     | RAR-related orphan receptor A                                                            | 6095   | 1,6 | 2,9E-02 |
| PLCG2    | phospholipase C, gamma 2 (phosphatidylinositol-specific)                                 | 5336   | 1,6 | 2,2E-02 |
| ARG1     | arginase 1                                                                               | 383    | 1,6 | 2,2E-02 |
| PLIN2    | perilipin 2                                                                              | 123    | 1,6 | 2,2E-02 |
| HYAL4    | hyaluronoglucosaminidase 4                                                               | 23553  | 1,6 | 4,0E-02 |
| FOXQ1    | forkhead box Q1                                                                          | 94234  | 1,6 | 8,9E-03 |
| ELOVL4   | ELOVL fatty acid elongase 4                                                              | 6785   | 1,6 | 1,5E-02 |
| TBC1D23  | TBC1 domain family, member 23                                                            | 55773  | 1,6 | 3,7E-04 |
| RORA     | RAR-related orphan receptor A                                                            | 6095   | 1,6 | 1,8E-02 |
| MCUR1    | mitochondrial calcium uniporter regulator 1                                              | 63933  | 1,6 | 6,8E-03 |
| CPM      | carboxypeptidase M                                                                       | 1368   | 1,6 | 1,1E-02 |
| GK       | glycerol kinase                                                                          | 2710   | 1,6 | 1,9E-02 |
| SLC44A5  | solute carrier family 44, member 5                                                       | 204962 | 1,6 | 2,8E-05 |
| GGT6     | gamma-glutamyltransferase 6                                                              | 124975 | 1,6 | 1,5E-02 |
| IDE      | insulin-degrading enzyme                                                                 | 3416   | 1,6 | 1,7E-02 |
| NA       | #N/A                                                                                     | #N/A   | 1,6 | 5,0E-02 |
| DHCR24   | 24-dehydrocholesterol reductase                                                          | 1718   | 1,6 | 1,4E-04 |
| SNHG9    | small nucleolar RNA host gene 9 (non-protein coding)                                     | 735301 | 1,6 | 3,7E-03 |
| ELOVL1   | ELOVL fatty acid elongase 1                                                              | 64834  | 1,6 | 6,6E-03 |
| BEX2     | brain expressed X-linked 2                                                               | 84707  | 1,6 | 1,0E-02 |
| ZNF165   | zinc finger protein 165                                                                  | 7718   | 1,6 | 8,8E-03 |
| CDK5RAP2 | CDK5 regulatory subunit associated protein 2                                             | 55755  | 1,6 | 4,0E-03 |
| LAMTOR4  | late endosomal/lysosomal adaptor, MAPK and MTOR activator 4                              | 389541 | 1,6 | 8,8E-03 |
| NPR2     | natriuretic peptide receptor B/guanylate cyclase B (atrionatriuretic peptide receptor B) | 4882   | 1,6 | 3,4E-02 |
| MYRFL    | myelin regulatory factor-like                                                            | 196446 | 1,6 | 1,2E-02 |
| SNTB1    | syntrophin, beta 1 (dystrophin-associated protein A1, 59kDa, basic component 1)          | 6641   | 1,6 | 2,1E-02 |
| ACER1    | alkaline ceramidase 1                                                                    | 125981 | 1,6 | 7,4E-03 |
| TGM3     | transglutaminase 3                                                                       | 7053   | 1,6 | 4,4E-02 |

|           |                                                                              |           |     |         |
|-----------|------------------------------------------------------------------------------|-----------|-----|---------|
| SLCO4A1   | solute carrier organic anion transporter family, member 4A1                  | 28231     | 1,5 | 2,7E-02 |
| KCTD11    | potassium channel tetramerization domain containing 11                       | 147040    | 1,5 | 1,7E-02 |
| ENDOU     | endonuclease, polyU-specific                                                 | 8909      | 1,5 | 1,8E-03 |
| TNNC1     | troponin C type 1 (slow)                                                     | 7134      | 1,5 | 1,5E-03 |
| HSPB8     | heat shock 22kDa protein 8                                                   | 26353     | 1,5 | 1,8E-02 |
| KLK1      | kallikrein 1                                                                 | 3816      | 1,5 | 2,9E-03 |
| SLC30A1   | solute carrier family 30 (zinc transporter), member 1                        | 7779      | 1,5 | 4,8E-03 |
| GPLD1     | glycosylphosphatidylinositol specific phospholipase D1                       | 2822      | 1,5 | 1,7E-03 |
| TIMM8A    | translocase of inner mitochondrial membrane 8 homolog A (yeast)              | 1678      | 1,5 | 3,5E-03 |
| PLAGL1    | pleiomorphic adenoma gene-like 1                                             | 5325      | 1,5 | 2,4E-03 |
| HPSE      | heparanase                                                                   | 10855     | 1,5 | 4,0E-02 |
| ITGAX     | integrin, alpha X (complement component 3 receptor 4 subunit)                | 3687      | 1,5 | 3,2E-02 |
| KDM2B     | lysine (K)-specific demethylase 2B                                           | 84678     | 1,5 | 1,7E-02 |
| VSIG10L   | V-set and immunoglobulin domain containing 10 like                           | 147645    | 1,5 | 2,8E-02 |
| CCSAP     | centriole, cilia and spindle-associated protein                              | 126731    | 1,5 | 3,2E-03 |
| ATP2C2    | ATPase, Ca <sup>++</sup> transporting, type 2C, member 2                     | 9914      | 1,5 | 3,6E-02 |
| SLC15A1   | solute carrier family 15 (oligopeptide transporter), member 1                | 6564      | 1,5 | 4,6E-02 |
| ESYT3     | extended synaptotagmin-like protein 3                                        | 83850     | 1,5 | 4,4E-02 |
| MTRR      | 5-methyltetrahydrofolate-homocysteine methyltransferase reductase            | 4552      | 1,5 | 1,8E-03 |
| PLA2G2F   | phospholipase A2, group IIF                                                  | 64600     | 1,5 | 1,1E-02 |
| ZSCAN12P1 | zinc finger and SCAN domain containing 12 pseudogene 1                       | 221584    | 1,5 | 3,5E-03 |
| OTUB2     | OTU domain, ubiquitin aldehyde binding 2                                     | 78990     | 1,5 | 4,3E-02 |
| BPIFC     | BPI fold containing family C                                                 | 254240    | 1,5 | 2,5E-02 |
| PCCA      | propionyl CoA carboxylase, alpha polypeptide                                 | 5095      | 1,5 | 1,1E-02 |
| CD55      | CD55 molecule, decay accelerating factor for complement (Cromer blood group) | 1604      | 1,5 | 3,7E-03 |
| HEIH      | hepatocellular carcinoma up-regulated EZH2-associated long non-coding RNA    | 100859930 | 1,5 | 5,7E-03 |
| HSD17B1   | hydroxysteroid (17-beta) dehydrogenase 1                                     | 3292      | 1,5 | 5,1E-03 |
| ABHD5     | abhydrolase domain containing 5                                              | 51099     | 1,5 | 3,3E-02 |
| MIR7-3HG  | MIR7-3 host gene (non-protein coding)                                        | 284424    | 1,5 | 2,2E-02 |
| PNPLA3    | patatin-like phospholipase domain containing 3                               | 80339     | 1,5 | 3,3E-03 |
| PTGER3    | prostaglandin E receptor 3 (subtype EP3)                                     | 5733      | 1,5 | 4,3E-02 |
| CNN3      | calponin 3, acidic                                                           | 1266      | 1,5 | 1,9E-02 |
| ACP6      | acid phosphatase 6, lysophosphatidic                                         | 51205     | 1,5 | 3,9E-02 |
| ABCA12    | ATP-binding cassette, sub-family A (ABC1), member 12                         | 26154     | 1,5 | 1,4E-03 |
| ATP10B    | ATPase, class V, type 10B                                                    | 23120     | 1,5 | 3,6E-02 |
| SRPK1     | SRSF protein kinase 1                                                        | 6732      | 1,5 | 1,8E-02 |
| ARG2      | arginase 2                                                                   | 384       | 1,5 | 3,5E-02 |
| CARD18    | caspase recruitment domain family, member 18                                 | 59082     | 1,5 | 2,2E-02 |
| ZIC2      | Zic family member 2                                                          | 7546      | 1,4 | 1,3E-02 |
| TREX2     | three prime repair exonuclease 2                                             | 11219     | 1,4 | 2,7E-02 |
| CYP4F22   | cytochrome P450, family 4, subfamily F, polypeptide 22                       | 126410    | 1,4 | 1,4E-02 |
| IL22RA1   | interleukin 22 receptor, alpha 1                                             | 58985     | 1,4 | 8,8E-03 |
| EPHX3     | epoxide hydrolase 3                                                          | 79852     | 1,4 | 3,4E-02 |
| PTDSS1    | phosphatidylserine synthase 1                                                | 9791      | 1,4 | 1,8E-02 |
| ANKRD9    | ankyrin repeat domain 9                                                      | 122416    | 1,4 | 2,2E-02 |
| MAP3K8    | mitogen-activated protein kinase kinase kinase 8                             | 1326      | 1,4 | 2,7E-03 |

|          |                                                                                |        |     |         |
|----------|--------------------------------------------------------------------------------|--------|-----|---------|
| GLB1L2   | galactosidase, beta 1-like 2                                                   | 89944  | 1,4 | 2,7E-02 |
| SCPEP1   | serine carboxypeptidase 1                                                      | 59342  | 1,4 | 1,4E-02 |
| SERPINB8 | serpin peptidase inhibitor, clade B (ovalbumin), member 8                      | 5271   | 1,4 | 3,3E-02 |
| LRRC8B   | leucine rich repeat containing 8 family, member B                              | 23507  | 1,4 | 1,9E-02 |
| FRY      | furry homolog (Drosophila)                                                     | 10129  | 1,4 | 4,1E-02 |
| KRT23    | keratin 23 (histone deacetylase inducible)                                     | 25984  | 1,4 | 1,0E-02 |
| HMOX1    | heme oxygenase (decycling) 1                                                   | 3162   | 1,4 | 3,1E-02 |
| TMEM86A  | transmembrane protein 86A                                                      | 144110 | 1,4 | 4,0E-02 |
| ABHD6    | abhydrolase domain containing 6                                                | 57406  | 1,4 | 4,9E-02 |
| SLC31A1  | solute carrier family 31 (copper transporter), member 1                        | 1317   | 1,4 | 2,6E-02 |
| CERS3    | ceramide synthase 3                                                            | 204219 | 1,4 | 1,6E-02 |
| SCNN1A   | sodium channel, non-voltage-gated 1 alpha subunit                              | 6337   | 1,4 | 4,5E-02 |
| FLVCR2   | feline leukemia virus subgroup C cellular receptor family, member 2            | 55640  | 1,4 | 1,2E-02 |
| TM7SF2   | transmembrane 7 superfamily member 2                                           | 7108   | 1,4 | 5,7E-03 |
| GATA3    | GATA binding protein 3                                                         | 2625   | 1,4 | 1,5E-02 |
| SPINK1   | serine peptidase inhibitor, Kazal type 1                                       | 6690   | 1,4 | 1,4E-02 |
| MOSPD2   | motile sperm domain containing 2                                               | 158747 | 1,4 | 1,6E-02 |
| DGAT2    | diacylglycerol O-acyltransferase 2                                             | 84649  | 1,4 | 3,5E-02 |
| OVOL1    | ovo-like 1(Drosophila)                                                         | 5017   | 1,4 | 3,4E-02 |
| DEGS2    | delta(4)-desaturase, sphingolipid 2                                            | 123099 | 1,4 | 2,2E-02 |
| ASPHD2   | aspartate beta-hydroxylase domain containing 2                                 | 57168  | 1,4 | 4,1E-02 |
| NQO1     | NAD(P)H dehydrogenase, quinone 1                                               | 1728   | 1,4 | 1,8E-02 |
| SLC19A2  | solute carrier family 19 (thiamine transporter), member 2                      | 10560  | 1,4 | 3,5E-02 |
| GGH      | gamma-glutamyl hydrolase (conjugase, folypolygammaglutamyl hydrolase)          | 8836   | 1,4 | 5,4E-03 |
| SPAG1    | sperm associated antigen 1                                                     | 6674   | 1,4 | 2,3E-02 |
| C12orf29 | chromosome 12 open reading frame 29                                            | 91298  | 1,4 | 1,5E-03 |
| SPRR2C   | small proline-rich protein 2C (pseudogene)                                     | 6702   | 1,4 | 3,6E-02 |
| RAPGEF4  | Rap guanine nucleotide exchange factor (GEF) 4                                 | 11069  | 1,4 | 2,4E-02 |
| GLCCI1   | glucocorticoid induced transcript 1                                            | 113263 | 1,4 | 4,9E-02 |
| SLC25A25 | solute carrier family 25 (mitochondrial carrier; phosphate carrier), member 25 | 114789 | 1,4 | 8,5E-04 |
| TTC39A   | tetratricopeptide repeat domain 39A                                            | 22996  | 1,4 | 2,7E-02 |
| CEBPA    | CCAAT/enhancer binding protein (C/EBP), alpha                                  | 1050   | 1,4 | 2,1E-02 |
| ETV7     | ets variant 7                                                                  | 51513  | 1,4 | 3,7E-02 |
| NIPAL4   | NIPA-like domain containing 4                                                  | 348938 | 1,4 | 3,6E-02 |
| DIO2     | deiodinase, iodothyronine, type II                                             | 1734   | 1,4 | 4,0E-02 |
| SPTLC3   | serine palmitoyltransferase, long chain base subunit 3                         | 55304  | 1,4 | 8,8E-03 |
| GPT2     | glutamic pyruvate transaminase (alanine aminotransferase) 2                    | 84706  | 1,4 | 3,5E-02 |
| PET112   | PET112 homolog (yeast)                                                         | 5188   | 1,4 | 2,2E-02 |
| ZRANB1   | zinc finger, RAN-binding domain containing 1                                   | 54764  | 1,4 | 5,0E-02 |
| PDZD2    | PDZ domain containing 2                                                        | 23037  | 1,4 | 3,5E-02 |
| TLL2     | tolloid-like 2                                                                 | 7093   | 1,4 | 2,7E-02 |
| BLVRB    | biliverdin reductase B (flavin reductase (NADPH))                              | 645    | 1,4 | 1,1E-02 |
| MID2     | midline 2                                                                      | 11043  | 1,4 | 4,7E-02 |
| HYMAI    | hydantidiform mole associated and imprinted (non-protein coding)               | 57061  | 1,4 | 3,1E-02 |
| PNPLA1   | patatin-like phospholipase domain containing 1                                 | 285848 | 1,4 | 3,3E-02 |
| FKBPL    | FK506 binding protein like                                                     | 63943  | 1,4 | 2,2E-02 |

|              |                                                                                     |           |     |         |
|--------------|-------------------------------------------------------------------------------------|-----------|-----|---------|
| LOC100130691 | uncharacterized LOC100130691                                                        | 100130691 | 1,4 | 3,1E-02 |
| PPT2         | palmitoyl-protein thioesterase 2                                                    | 9374      | 1,4 | 2,7E-02 |
| PLEKHG1      | pleckstrin homology domain containing, family G (with RhoGef domain) member 1       | 57480     | 1,4 | 4,2E-03 |
| DUSP1        | dual specificity phosphatase 1                                                      | 1843      | 1,4 | 3,4E-03 |
| DDAH2        | dimethylarginine dimethylaminohydrolase 2                                           | 23564     | 1,4 | 4,9E-02 |
| GSTA4        | glutathione S-transferase alpha 4                                                   | 2941      | 1,4 | 2,2E-02 |
| PXMP4        | peroxisomal membrane protein 4, 24kDa                                               | 11264     | 1,4 | 1,1E-02 |
| POF1B        | premature ovarian failure, 1B                                                       | 79983     | 1,4 | 4,1E-02 |
| DNAJB9       | DnaJ (Hsp40) homolog, subfamily B, member 9                                         | 4189      | 1,4 | 5,5E-03 |
| RAB11FIP1    | RAB11 family interacting protein 1 (class I)                                        | 80223     | 1,4 | 3,0E-02 |
| AKIRIN1      | akirin 1                                                                            | 79647     | 1,4 | 1,2E-02 |
| SERPINA6     | serpin peptidase inhibitor, clade A (alpha-1 antiproteinase, antitrypsin), member 6 | 866       | 1,4 | 3,4E-02 |
| MGC57346     | uncharacterized LOC401884                                                           | 401884    | 1,4 | 1,7E-05 |
| KLF4         | Kruppel-like factor 4 (gut)                                                         | 9314      | 1,3 | 3,2E-02 |
| L2HGDH       | L-2-hydroxyglutarate dehydrogenase                                                  | 79944     | 1,3 | 1,2E-02 |
| TTC39B       | tetratricopeptide repeat domain 39B                                                 | 158219    | 1,3 | 1,3E-02 |
| TSPAN5       | tetraspanin 5                                                                       | 10098     | 1,3 | 4,4E-02 |
| FAM13C       | family with sequence similarity 13, member C                                        | 220965    | 1,3 | 4,4E-02 |
| ATG2A        | autophagy related 2A                                                                | 23130     | 1,3 | 4,1E-02 |
| G6PD         | glucose-6-phosphate dehydrogenase                                                   | 2539      | 1,3 | 4,2E-02 |
| HSBP1L1      | heat shock factor binding protein 1-like 1                                          | 440498    | 1,3 | 1,1E-02 |
| EGR1         | early growth response 1                                                             | 1958      | 1,3 | 9,4E-03 |
| ARL5A        | ADP-ribosylation factor-like 5A                                                     | 26225     | 1,3 | 2,9E-02 |
| SLC28A3      | solute carrier family 28 (concentrative nucleoside transporter), member 3           | 64078     | 1,3 | 2,3E-02 |
| ERC2         | ELKS/RAB6-interacting/CAST family member 2                                          | 26059     | 1,3 | 3,0E-02 |
| TEX264       | testis expressed 264                                                                | 51368     | 1,3 | 4,9E-02 |
| GRHL1        | grainyhead-like 1 (Drosophila)                                                      | 29841     | 1,3 | 3,4E-02 |
| CCDC58       | coiled-coil domain containing 58                                                    | 131076    | 1,3 | 1,6E-02 |
| VWF          | von Willebrand factor                                                               | 7450      | 1,3 | 3,5E-03 |
| AZGP1P1      | alpha-2-glycoprotein 1, zinc-binding pseudogene 1                                   | 646282    | 1,3 | 4,6E-02 |
| OVOL1        | ovo-like 1(Drosophila)                                                              | 5017      | 1,3 | 4,3E-02 |
| PGRMC2       | progesterone receptor membrane component 2                                          | 10424     | 1,3 | 8,8E-03 |
| VASN         | vasorin                                                                             | 114990    | 1,3 | 4,6E-02 |
| EIF4A3       | eukaryotic translation initiation factor 4A3                                        | 9775      | 1,3 | 3,4E-02 |
| CARD9        | caspase recruitment domain family, member 9                                         | 64170     | 1,3 | 1,2E-03 |
| TINCR        | tissue differentiation-inducing non-protein coding RNA                              | 257000    | 1,3 | 4,7E-02 |
| CIDEA        | cell death-inducing DFFA-like effector a                                            | 1149      | 1,3 | 4,1E-02 |
| NKPD1        | NTPase, KAP family P-loop domain containing 1                                       | 284353    | 1,3 | 4,5E-02 |
| MAST3        | microtubule associated serine/threonine kinase 3                                    | 23031     | 1,3 | 4,4E-02 |
| TSTD1        | thiosulfate sulfurtransferase (rhodanese)-like domain containing 1                  | 100131187 | 1,3 | 4,0E-03 |
| FCHSD1       | FCH and double SH3 domains 1                                                        | 89848     | 1,3 | 3,7E-02 |
| SWI5         | SWI5 recombination repair homolog (yeast)                                           | 375757    | 1,3 | 1,8E-02 |
| RALGAPA2     | Ral GTPase activating protein, alpha subunit 2 (catalytic)                          | 57186     | 1,3 | 2,1E-02 |
| PNPLA8       | patatin-like phospholipase domain containing 8                                      | 50640     | 1,3 | 5,8E-03 |
| APOE         | apolipoprotein E                                                                    | 348       | 1,3 | 4,1E-02 |
| GOLGA4       | golgin A4                                                                           | 2803      | 1,3 | 9,9E-03 |

|           |                                                                      |           |     |         |
|-----------|----------------------------------------------------------------------|-----------|-----|---------|
| BLOC1S3   | biogenesis of lysosomal organelles complex-1, subunit 3              | 388552    | 1,3 | 6,1E-03 |
| ARHGEF10L | Rho guanine nucleotide exchange factor (GEF) 10-like                 | 55160     | 1,3 | 4,0E-02 |
| PLCXD1    | phosphatidylinositol-specific phospholipase C, X domain containing 1 | 55344     | 1,3 | 4,3E-02 |
| TMPRSS13  | transmembrane protease, serine 13                                    | 84000     | 1,3 | 4,9E-02 |
| DNAJC1    | DnaJ (Hsp40) homolog, subfamily C, member 1                          | 64215     | 1,3 | 3,4E-02 |
| SLC27A4   | solute carrier family 27 (fatty acid transporter), member 4          | 10999     | 1,3 | 3,0E-02 |
| POR       | P450 (cytochrome) oxidoreductase                                     | 5447      | 1,3 | 4,2E-03 |
| GAS7      | growth arrest-specific 7                                             | 8522      | 1,3 | 3,7E-02 |
| SYTL2     | synaptotagmin-like 2                                                 | 54843     | 1,3 | 1,5E-03 |
| ANKRD22   | ankyrin repeat domain 22                                             | 118932    | 1,3 | 3,6E-02 |
| NA        | #N/A                                                                 | #N/A      | 1,3 | 9,5E-03 |
| EFCAB14   | EF-hand calcium binding domain 14                                    | 9813      | 1,3 | 8,8E-03 |
| CAMP      | cathelicidin antimicrobial peptide                                   | 820       | 1,3 | 1,8E-03 |
| SEL1L     | sel-1 suppressor of lin-12-like (C. elegans)                         | 6400      | 1,3 | 2,0E-02 |
| UGCG      | UDP-glucose ceramide glucosyltransferase                             | 7357      | 1,3 | 3,3E-02 |
| MAPK7     | mitogen-activated protein kinase 7                                   | 5598      | 1,3 | 2,3E-02 |
| SNRK-AS1  | SNRK antisense RNA 1                                                 | 100873954 | 1,3 | 8,8E-03 |
| FAM73B    | family with sequence similarity 73, member B                         | 84895     | 1,3 | 1,2E-02 |
| USP32     | ubiquitin specific peptidase 32                                      | 84669     | 1,3 | 4,3E-02 |
| BAALC     | brain and acute leukemia, cytoplasmic                                | 79870     | 1,3 | 1,2E-03 |

## b

| Official symbol | Official full name                                                                              | EntrezID  | Pseudo Fc | Adjusted p-value |
|-----------------|-------------------------------------------------------------------------------------------------|-----------|-----------|------------------|
| SPINK6          | serine peptidase inhibitor, Kazal type 6                                                        | 404203    | -4,8      | 6,1E-03          |
| DDX17           | DEAD (Asp-Glu-Ala-Asp) box helicase 17                                                          | 10521     | -3,9      | 7,5E-03          |
| CEACAM6         | carcinoembryonic antigen-related cell adhesion molecule 6 (non-specific cross reacting antigen) | 4680      | -3,5      | 3,1E-02          |
| ABHD3           | abhydrolase domain containing 3                                                                 | 171586    | -3,0      | 2,2E-03          |
| POLB            | polymerase (DNA directed), beta                                                                 | 5423      | -2,7      | 1,7E-02          |
| GLUL            | glutamate-ammonia ligase                                                                        | 2752      | -2,7      | 1,9E-02          |
| ERP27           | endoplasmic reticulum protein 27                                                                | 121506    | -2,4      | 4,6E-02          |
| MRPL43          | mitochondrial ribosomal protein L43                                                             | 84545     | -2,3      | 4,5E-02          |
| RAB12           | RAB12, member RAS oncogene family                                                               | 201475    | -2,2      | 1,8E-03          |
| RHCG            | Rh family, C glycoprotein                                                                       | 51458     | -2,1      | 2,3E-02          |
| DNAH10          | dynein, axonemal, heavy chain 10                                                                | 196385    | -2,0      | 2,4E-02          |
| LCN2            | lipocalin 2                                                                                     | 3934      | -2,0      | 4,4E-02          |
| TMEM200A        | transmembrane protein 200A                                                                      | 114801    | -2,0      | 1,8E-03          |
| DKK1            | dickkopf WNT signaling pathway inhibitor 1                                                      | 22943     | -1,9      | 2,2E-02          |
| SRPX            | sushi-repeat containing protein, X-linked                                                       | 8406      | -1,9      | 6,6E-03          |
| HOTAIR          | HOX transcript antisense RNA                                                                    | 100124700 | -1,8      | 2,7E-03          |
| PLA2G4C         | phospholipase A2, group IVC (cytosolic, calcium-independent)                                    | 8605      | -1,7      | 2,4E-02          |
| ADAM19          | ADAM metallopeptidase domain 19                                                                 | 8728      | -1,7      | 4,6E-03          |
| SPOCK1          | sparc/osteonectin, cwcv and kazal-like domains proteoglycan (testican) 1                        | 6695      | -1,7      | 4,7E-02          |
| KYNU            | kynureninase                                                                                    | 8942      | -1,7      | 3,0E-02          |
| CXCL1           | chemokine (C-X-C motif) ligand 1 (melanoma growth stimulating activity, alpha)                  | 2919      | -1,7      | 2,7E-02          |

|              |                                                       |           |      |         |
|--------------|-------------------------------------------------------|-----------|------|---------|
| EPB41L3      | erythrocyte membrane protein band 4.1-like 3          | 23136     | -1,7 | 5,7E-03 |
| GPX2         | glutathione peroxidase 2 (gastrointestinal)           | 2877      | -1,7 | 3,6E-02 |
| ANXA3        | annexin A3                                            | 306       | -1,7 | 2,7E-02 |
| ITM2A        | integral membrane protein 2A                          | 9452      | -1,7 | 3,4E-03 |
| C7orf10      | chromosome 7 open reading frame 10                    | 79783     | -1,7 | 1,1E-02 |
| IGFBP7       | insulin-like growth factor binding protein 7          | 3490      | -1,7 | 2,0E-02 |
| TRIM6        | tripartite motif containing 6                         | 117854    | -1,7 | 1,6E-02 |
| ARPC1B       | actin related protein 2/3 complex, subunit 1B, 41kDa  | 10095     | -1,7 | 9,2E-04 |
| RTTN         | rotatin                                               | 25914     | -1,7 | 5,6E-03 |
| CD99P1       | CD99 molecule pseudogene 1                            | 401577    | -1,7 | 1,8E-02 |
| GLUL         | glutamate-ammonia ligase                              | 2752      | -1,7 | 4,3E-02 |
| GOLM1        | golgi membrane protein 1                              | 51280     | -1,7 | 3,4E-02 |
| CALB2        | calbindin 2                                           | 794       | -1,6 | 1,8E-02 |
| PTHLH        | parathyroid hormone-like hormone                      | 5744      | -1,6 | 4,4E-02 |
| NTN4         | netrin 4                                              | 59277     | -1,6 | 1,2E-02 |
| SPRY2        | sprouty homolog 2 (Drosophila)                        | 10253     | -1,6 | 1,2E-02 |
| MFAP5        | microfibrillar associated protein 5                   | 8076      | -1,6 | 1,4E-02 |
| C15orf65     | chromosome 15 open reading frame 65                   | 145788    | -1,6 | 8,5E-04 |
| ZSCAN31      | zinc finger and SCAN domain containing 31             | 64288     | -1,6 | 3,5E-02 |
| VIM          | vimentin                                              | 7431      | -1,6 | 6,9E-03 |
| HLA-B        | major histocompatibility complex, class I, B          | 3106      | -1,6 | 3,5E-02 |
| HCP5         | HLA complex P5 (non-protein coding)                   | 10866     | -1,6 | 1,7E-02 |
| LOC100505547 | uncharacterized LOC100505547                          | 100505547 | -1,6 | 2,5E-04 |
| XDH          | xanthine dehydrogenase                                | 7498      | -1,6 | 4,4E-02 |
| FUK          | fucokinase                                            | 197258    | -1,6 | 2,7E-03 |
| SRPX2        | sushi-repeat containing protein, X-linked 2           | 27286     | -1,5 | 1,3E-02 |
| FEZ1         | fasciculation and elongation protein zeta 1 (zygin I) | 9638      | -1,5 | 3,2E-02 |
| SIDT1        | SID1 transmembrane family, member 1                   | 54847     | -1,5 | 4,9E-02 |
| TMPRSS11D    | transmembrane protease, serine 11D                    | 9407      | -1,5 | 3,7E-02 |
| ANXA1        | annexin A1                                            | 301       | -1,5 | 4,9E-02 |
| HOXC10       | homeobox C10                                          | 3226      | -1,5 | 4,0E-03 |
| RASSF6       | Ras association (RalGDS/AF-6) domain family member 6  | 166824    | -1,5 | 7,5E-03 |
| CARD16       | caspase recruitment domain family, member 16          | 114769    | -1,5 | 3,3E-02 |
| PITX1        | paired-like homeodomain 1                             | 5307      | -1,5 | 8,1E-03 |
| MARVELD1     | MARVEL domain containing 1                            | 83742     | -1,5 | 2,2E-02 |
| AFAP1L2      | actin filament associated protein 1-like 2            | 84632     | -1,5 | 9,8E-03 |
| ALDH8A1      | aldehyde dehydrogenase 8 family, member A1            | 64577     | -1,5 | 1,9E-02 |
| MRAP2        | melanocortin 2 receptor accessory protein 2           | 112609    | -1,5 | 1,8E-02 |
| PHLDA1       | pleckstrin homology-like domain, family A, member 1   | 22822     | -1,5 | 3,4E-02 |
| ARHGAP25     | Rho GTPase activating protein 25                      | 9938      | -1,5 | 2,2E-02 |
| EHBP1        | EH domain binding protein 1                           | 23301     | -1,5 | 1,7E-02 |
| SHISA2       | shisa family member 2                                 | 387914    | -1,5 | 2,3E-02 |
| S100A6       | S100 calcium binding protein A6                       | 6277      | -1,5 | 9,5E-03 |
| C4orf33      | chromosome 4 open reading frame 33                    | 132321    | -1,5 | 1,3E-02 |
| HLA-F        | major histocompatibility complex, class I, F          | 3134      | -1,5 | 2,0E-02 |
| GCHFR        | GTP cyclohydrolase I feedback regulator               | 2644      | -1,5 | 4,3E-02 |



|            |                                                                                         |          |      |         |
|------------|-----------------------------------------------------------------------------------------|----------|------|---------|
| RASSF3     | Ras association (RalGDS/AF-6) domain family member 3                                    | 283349   | -1,5 | 3,8E-02 |
| SORL1      | sortilin-related receptor, L(DLR class) A repeats containing                            | 6653     | -1,5 | 9,5E-03 |
| BASP1      | brain abundant, membrane attached signal protein 1                                      | 10409    | -1,5 | 1,2E-02 |
| SOX9       | SRY (sex determining region Y)-box 9                                                    | 6662     | -1,5 | 2,2E-02 |
| MXRA7      | matrix-remodelling associated 7                                                         | 439921   | -1,5 | 4,0E-02 |
| FNDC3B     | fibronectin type III domain containing 3B                                               | 64778    | -1,5 | 2,2E-02 |
| EHBP1      | EH domain binding protein 1                                                             | 23301    | -1,5 | 2,3E-02 |
| KIAA1598   | KIAA1598                                                                                | 57698    | -1,5 | 2,5E-04 |
| HMGA2      | high mobility group AT-hook 2                                                           | 8091     | -1,5 | 1,7E-02 |
| GSTO1      | glutathione S-transferase omega 1                                                       | 9446     | -1,5 | 2,5E-02 |
| RAC2       | ras-related C3 botulinum toxin substrate 2 (rho family, small GTP binding protein Rac2) | 5880     | -1,5 | 2,9E-02 |
| C4orf48    | chromosome 4 open reading frame 48                                                      | 401115   | -1,5 | 3,2E-02 |
| ANKRD36BP2 | ankyrin repeat domain 36B pseudogene 2                                                  | 645784   | -1,5 | 5,7E-03 |
| IAH1       | isoamyl acetate-hydrolyzing esterase 1 homolog (S. cerevisiae)                          | 285148   | -1,5 | 1,5E-02 |
| ITGB6      | integrin, beta 6                                                                        | 3694     | -1,5 | 3,2E-02 |
| MFAP2      | microfibrillar-associated protein 2                                                     | 4237     | -1,4 | 2,9E-02 |
| BACE2      | beta-site APP-cleaving enzyme 2                                                         | 25825    | -1,4 | 4,0E-02 |
| PLEKHH2    | pleckstrin homology domain containing, family H (with MyTH4 domain) member 2            | 130271   | -1,4 | 4,2E-03 |
| ACTB       | actin, beta                                                                             | 60       | -1,4 | 1,4E-03 |
| TRIM2      | tripartite motif containing 2                                                           | 23321    | -1,4 | 3,2E-02 |
| YWHAH      | tyrosine 3-monooxygenase/tryptophan 5-monooxygenase activation protein, eta polypeptide | 7533     | -1,4 | 2,2E-02 |
| FXYS5      | FXYS domain containing ion transport regulator 5                                        | 53827    | -1,4 | 4,1E-02 |
| SLC12A8    | solute carrier family 12, member 8                                                      | 84561    | -1,4 | 1,1E-02 |
| RHOBTB1    | Rho-related BTB domain containing 1                                                     | 9886     | -1,4 | 1,1E-02 |
| ARL6IP5    | ADP-ribosylation-like factor 6 interacting protein 5                                    | 10550    | -1,4 | 4,7E-02 |
| ENC1       | ectodermal-neural cortex 1 (with BTB domain)                                            | 8507     | -1,4 | 4,6E-02 |
| TACC1      | transforming, acidic coiled-coil containing protein 1                                   | 6867     | -1,4 | 2,2E-02 |
| GALNT7     | UDP-N-acetyl-alpha-D-galactosamine:polypeptide acetyltransferase 7 (GalNAc-T7)          | N- 51809 | -1,4 | 1,2E-02 |
| NT5E       | 5'-nucleotidase, ecto (CD73)                                                            | 4907     | -1,4 | 1,5E-02 |
| PLAU       | plasminogen activator, urokinase                                                        | 5328     | -1,4 | 1,1E-02 |
| CDH3       | cadherin 3, type 1, P-cadherin (placental)                                              | 1001     | -1,4 | 4,0E-03 |
| KRT17      | keratin 17                                                                              | 3872     | -1,4 | 3,0E-02 |
| BLVRA      | biliverdin reductase A                                                                  | 644      | -1,4 | 5,7E-03 |
| ACOT9      | acyl-CoA thioesterase 9                                                                 | 23597    | -1,4 | 2,9E-02 |
| SDCBP      | syndecan binding protein (syntenin)                                                     | 6386     | -1,4 | 5,1E-03 |
| PEX6       | peroxisomal biogenesis factor 6                                                         | 5190     | -1,4 | 2,2E-02 |
| SMURF2     | SMAD specific E3 ubiquitin protein ligase 2                                             | 64750    | -1,4 | 2,4E-02 |
| ENC1       | ectodermal-neural cortex 1 (with BTB domain)                                            | 8507     | -1,4 | 3,5E-02 |
| FAM114A1   | family with sequence similarity 114, member A1                                          | 92689    | -1,4 | 2,3E-02 |
| ARHGAP18   | Rho GTPase activating protein 18                                                        | 93663    | -1,4 | 2,0E-02 |
| PMAIP1     | phorbol-12-myristate-13-acetate-induced protein 1                                       | 5366     | -1,4 | 4,0E-03 |
| ARL14      | ADP-ribosylation factor-like 14                                                         | 80117    | -1,4 | 3,2E-02 |
| ENTPD3     | ectonucleoside triphosphate diphosphohydrolase 3                                        | 956      | -1,4 | 4,7E-02 |
| LIMA1      | LIM domain and actin binding 1                                                          | 51474    | -1,4 | 3,7E-03 |
| EMX2       | empty spiracles homeobox 2                                                              | 2018     | -1,4 | 2,2E-02 |

|              |                                                                                                               |           |      |         |
|--------------|---------------------------------------------------------------------------------------------------------------|-----------|------|---------|
| CIB1         | calcium and integrin binding 1 (calmyrin)                                                                     | 10519     | -1,4 | 1,5E-02 |
| B4GALT5      | UDP-Gal:betaGlcNAc beta 1,4- galactosyltransferase, polypeptide 5                                             | 9334      | -1,4 | 4,2E-03 |
| TLL7         | tubulin tyrosine ligase-like family, member 7                                                                 | 79739     | -1,4 | 1,9E-02 |
| LAMB1        | laminin, beta 1                                                                                               | 3912      | -1,4 | 9,1E-03 |
| C4orf19      | chromosome 4 open reading frame 19                                                                            | 55286     | -1,4 | 4,1E-02 |
| FOXP1-IT1    | FOXP1 intronic transcript 1 (non-protein coding)                                                              | 100506815 | -1,4 | 3,4E-02 |
| DSG2         | desmoglein 2                                                                                                  | 1829      | -1,4 | 4,6E-02 |
| ALDH7A1      | aldehyde dehydrogenase 7 family, member A1                                                                    | 501       | -1,4 | 2,7E-02 |
| PSTPIP2      | proline-serine-threonine phosphatase interacting protein 2                                                    | 9050      | -1,4 | 1,4E-02 |
| CASP7        | caspase 7, apoptosis-related cysteine peptidase                                                               | 840       | -1,4 | 3,5E-03 |
| TUBGCP4      | tubulin, gamma complex associated protein 4                                                                   | 27229     | -1,4 | 3,6E-03 |
| OCIAD2       | OCIA domain containing 2                                                                                      | 132299    | -1,4 | 5,7E-03 |
| UAP1         | UDP-N-acetylglucosamine pyrophosphorylase 1                                                                   | 6675      | -1,4 | 1,8E-02 |
| FEZ2         | fasciculation and elongation protein zeta 2 (zygin II)                                                        | 9637      | -1,4 | 1,7E-02 |
| KCTD3        | potassium channel tetramerization domain containing 3                                                         | 51133     | -1,4 | 1,9E-02 |
| RICTOR       | RPTOR independent companion of MTOR, complex 2                                                                | 253260    | -1,4 | 4,9E-02 |
| CSNK1D       | casein kinase 1, delta                                                                                        | 1453      | -1,4 | 2,0E-02 |
| PALLD        | palladin, cytoskeletal associated protein                                                                     | 23022     | -1,4 | 1,6E-02 |
| ARSJ         | arylsulfatase family, member J                                                                                | 79642     | -1,4 | 2,4E-03 |
| CCDC109B     | coiled-coil domain containing 109B                                                                            | 55013     | -1,4 | 1,4E-03 |
| IFI16        | interferon, gamma-inducible protein 16                                                                        | 3428      | -1,4 | 1,2E-02 |
| GLCE         | glucuronic acid epimerase                                                                                     | 26035     | -1,4 | 1,9E-02 |
| ARHGEF40     | Rho guanine nucleotide exchange factor (GEF) 40                                                               | 55701     | -1,4 | 2,6E-02 |
| ZNF816       | zinc finger protein 816                                                                                       | 125893    | -1,4 | 2,4E-02 |
| CKAP2        | cytoskeleton associated protein 2                                                                             | 26586     | -1,4 | 3,6E-02 |
| AKR1B1       | aldo-keto reductase family 1, member B1 (aldose reductase)                                                    | 231       | -1,4 | 4,0E-02 |
| FCHSD2       | FCH and double SH3 domains 2                                                                                  | 9873      | -1,3 | 7,0E-03 |
| IGF1R        | insulin-like growth factor 1 receptor                                                                         | 3480      | -1,3 | 4,7E-02 |
| EOGT         | EGF domain-specific O-linked N-acetylglucosamine (GlcNAc) transferase                                         | 285203    | -1,3 | 4,0E-02 |
| C1orf74      | chromosome 1 open reading frame 74                                                                            | 148304    | -1,3 | 4,0E-02 |
| PRKACB       | protein kinase, cAMP-dependent, catalytic, beta                                                               | 5567      | -1,3 | 1,4E-02 |
| CYSTM1       | cysteine-rich transmembrane module containing 1                                                               | 84418     | -1,3 | 2,1E-02 |
| ETHE1        | ethylmalonic encephalopathy 1                                                                                 | 23474     | -1,3 | 2,4E-02 |
| SERPINF1     | serpin peptidase inhibitor, clade F (alpha-2 antiplasmin, pigment epithelium derived factor), member 1        | 5176      | -1,3 | 4,5E-02 |
| BOLA3        | bolA family member 3                                                                                          | 388962    | -1,3 | 1,7E-02 |
| CST3         | cystatin C                                                                                                    | 1471      | -1,3 | 3,1E-02 |
| ST6GALNAC2   | ST6 (alpha-N-acetyl-neuraminyl-2,3-beta-galactosyl-1,3)-N-acetylgalactosaminide alpha-2,6-sialyltransferase 2 | 10610     | -1,3 | 4,1E-02 |
| DDX17        | DEAD (Asp-Glu-Ala-Asp) box helicase 17                                                                        | 10521     | -1,3 | 2,5E-02 |
| RNF19B       | ring finger protein 19B                                                                                       | 127544    | -1,3 | 1,6E-02 |
| LPGAT1       | lysophosphatidylglycerol acyltransferase 1                                                                    | 9926      | -1,3 | 4,6E-03 |
| LINC00467    | long intergenic non-protein coding RNA 467                                                                    | 84791     | -1,3 | 9,3E-03 |
| MYOF         | myoferlin                                                                                                     | 26509     | -1,3 | 4,2E-03 |
| PHYH         | phytanoyl-CoA 2-hydroxylase                                                                                   | 5264      | -1,3 | 4,5E-02 |
| FAM213A      | family with sequence similarity 213, member A                                                                 | 84293     | -1,3 | 4,8E-03 |
| RHOC         | ras homolog family member C                                                                                   | 389       | -1,3 | 9,4E-03 |
| LOC100506870 | uncharacterized LOC100506870                                                                                  | 100506870 | -1,3 | 4,4E-02 |

|             |                                                                                                   |    |        |      |         |
|-------------|---------------------------------------------------------------------------------------------------|----|--------|------|---------|
| CAPNS1      | calpain, small subunit 1                                                                          |    | 826    | -1,3 | 2,7E-02 |
| UBN1        | ubiquitin 1                                                                                       |    | 29855  | -1,3 | 1,6E-02 |
| SNX7        | sorting nexin 7                                                                                   |    | 51375  | -1,3 | 2,7E-02 |
| EDN1        | endothelin 1                                                                                      |    | 1906   | -1,3 | 2,5E-02 |
| DOCK11      | dedicator of cytokinesis 11                                                                       |    | 139818 | -1,3 | 1,4E-02 |
| IQGAP1      | IQ motif containing GTPase activating protein 1                                                   |    | 8826   | -1,3 | 4,4E-02 |
| SHISA5      | shisa family member 5                                                                             |    | 51246  | -1,3 | 3,2E-02 |
| PFN1        | profilin 1                                                                                        |    | 5216   | -1,3 | 3,5E-03 |
| PRDX3       | peroxiredoxin 3                                                                                   |    | 10935  | -1,3 | 3,6E-02 |
| RNPEP       | arginyl aminopeptidase (aminopeptidase B)                                                         |    | 6051   | -1,3 | 2,2E-02 |
| SH3RF1      | SH3 domain containing ring finger 1                                                               |    | 57630  | -1,3 | 1,5E-02 |
| ARHGAP5-AS1 | ARHGAP5 antisense RNA 1 (head to head)                                                            |    | 84837  | -1,3 | 2,1E-02 |
| TRIM38      | tripartite motif containing 38                                                                    |    | 10475  | -1,3 | 8,2E-03 |
| GALNT2      | UDP-N-acetyl-alpha-D-galactosamine:polypeptide<br>acetylgalactosaminyltransferase 2 (GalNAc-T2)   | N- | 2590   | -1,3 | 3,4E-02 |
| DFNA5       | deafness, autosomal dominant 5                                                                    |    | 1687   | -1,3 | 9,5E-03 |
| FN3KRP      | fructosamine 3 kinase related protein                                                             |    | 79672  | -1,3 | 4,9E-02 |
| GALNT14     | UDP-N-acetyl-alpha-D-galactosamine:polypeptide<br>acetylgalactosaminyltransferase 14 (GalNAc-T14) | N- | 79623  | -1,3 | 3,6E-02 |
| TMEM14A     | transmembrane protein 14A                                                                         |    | 28978  | -1,3 | 2,1E-02 |
| CD59        | CD59 molecule, complement regulatory protein                                                      |    | 966    | -1,3 | 3,2E-02 |
| PHC2        | polyhomeotic homolog 2 (Drosophila)                                                               |    | 1912   | -1,3 | 2,2E-03 |
| HLA-J       | major histocompatibility complex, class I, J (pseudogene)                                         |    | 3137   | -1,3 | 4,6E-02 |
| CDC27       | cell division cycle 27                                                                            |    | 996    | -1,3 | 4,9E-02 |
| ACER3       | alkaline ceramidase 3                                                                             |    | 55331  | -1,3 | 3,2E-02 |

**Supplementary Table S1.** List of regulated genes between epidermis from RS with cells of Caucasian skin type when compared to those with cells of African skin type. Genes up-regulated (**a**), genes down-regulated (**b**) identified by micro-array analysis with  $F_c \geq 1.3$  and FDR adjusted  $P \leq 0.05$ .

**a**

| Related metabolism                | Official symbol | Function    | Official full name                                     | Pseudo Fc | Adjusted p-value |
|-----------------------------------|-----------------|-------------|--------------------------------------------------------|-----------|------------------|
| Fatty acyls/fatty acid            | FAR2            | enzyme      | fatty acyl CoA reductase 2                             | 2.6       | 0.010            |
|                                   | AADAC           | enzyme      | arylacetamide deacetylase                              | 2.4       | 0.008            |
|                                   | ALOX12          | enzyme      | arachidonate 12-lipoxygenase                           | 2.2       | 0.004            |
|                                   | ELOVL3          | enzyme      | ELOVL fatty acid elongase 3                            | 2.2       | 0.012            |
|                                   | AADACL2         | enzyme      | arylacetamide deacetylase-like 2                       | 1.9       | 0.011            |
|                                   | ELOVL7          | enzyme      | ELOVL fatty acid elongase 7                            | 1.7       | 0.008            |
|                                   | ELOVL4          | enzyme      | ELOVL fatty acid elongase 4                            | 1.6       | 0.015            |
|                                   | ELOVL1          | enzyme      | ELOVL fatty acid elongase 1                            | 1.6       | 0.007            |
| Phospholipid                      | SLC44A5         | transporter | solute carrier family 44, member 5                     | 5.7       | 0.00001          |
|                                   | ABHD3           | enzyme      | abhydrolase domain-containing protein 3                | -3.0      | 0.002            |
| Sphingolipid/ceramid              | SPTSSB          | enzyme      | serine palmitoyltransferase, small subunit B           | 1.8       | 0.001            |
|                                   | ACER1           | enzyme      | alkaline ceramidase 1                                  | 1.6       | 0.007            |
|                                   | DEGS2           | enzyme      | delta(4)-desaturase, sphingolipid                      | 1.4       | 0.022            |
|                                   | CERS3           | enzyme      | ceramide synthase 3                                    | 1.4       | 0.016            |
|                                   | SPTLC3          | enzyme      | serine palmitoyltransferase, long chain base subunit 3 | 1.4       | 0.009            |
|                                   | ACER3           | enzyme      | Alkaline Ceramidase 3                                  | -1.3      | 0.032            |
|                                   | GLA             | enzyme      | galactosidase, alpha                                   | 1.3       | 0.017            |
|                                   | UGCG            | enzyme      | UDP-glucose ceramide glucosyltransferase               | 1.3       | 0.033            |
|                                   | ABCA12          | transporter | ATP-binding cassette, sub-family A (ABC1), member 12   | 1.5       | 0.001            |
| Sterol lipid/ cholesterol         | CH25H           | enzyme      | cholesterol 25-hydroxylase                             | 2.9       | 0.013            |
|                                   | DHCR24          | enzyme      | 24-dehydrocholesterol reductase                        | 1.6       | 0.0001           |
| Glycerolipid                      | GK              | enzyme      | glycerol kinase                                        | 1.6       | 0.019            |
|                                   | PNPLA3          | enzyme      | Patatin-like phospholipase domain containing 3         | 1.5       | 0.003            |
|                                   | DGAT2           | enzyme      | Diacylglycerol O-acyltransferase 2                     | 1.4       | 0.035            |
|                                   | ALDH7A1         | enzyme      | Aldehyde dehydrogenase 7 family, member A1             | -1.4      | 0.027            |
|                                   | AKR1B1          | enzyme      | aldo-keto reductase family 1, member B1                | -1.4      | 0.04             |
| Miscellaneous lipid related genes | PLIN2           | binding     | perilipin 2                                            | 1.6       | 0.022            |
|                                   | PNPLA1          | enzyme      | patatin-like phospholipase domain containing 1         | 1.4       | 0.033            |

**b**

| Related metabolism   | Official symbol | Function  | Official full name                                      | Pseudo Fc | Adjusted p-value |
|----------------------|-----------------|-----------|---------------------------------------------------------|-----------|------------------|
| Filaggrin processing | BLMH            | enzyme    | bleomycin hydrolase                                     | 2.2       | 0.034            |
|                      | HAL             | enzyme    | histidine ammonia-lyase                                 | 1.9       | 0.012            |
|                      | ARG1            | enzyme    | arginase-1                                              | 1.6       | 0.02             |
| Proteases/inhibitors | SPINK6          | inhibitor | serine peptidase inhibitor, Kazal type                  | -4.8      | 0.006            |
|                      | KLK1            | enzyme    | kallikrein 1                                            | 1.5       | 0.003            |
|                      | KLK9            | enzyme    | kallikrein 9                                            | 1.8       | 0.007            |
|                      | KLK5            | enzyme    | kallikrein 5                                            | 1.3       | 0.053            |
|                      | SERPINB3        | inhibitor | serpin peptidase inhibitor, clade B (ovalbumin), member | 1.3       | 0.05             |
| Cross-linking        | TGM3            | enzyme    | transglutaminase 3                                      | 1.6       | 0.044            |
| Transcription factor | POU2F3          |           | POU class 2 homeobox 3                                  | 1.3       | 0.010            |
| Calcium influx       | PTH2R           | receptor  | parathyroid hormone 2 receptor                          | 2.8       | 0.004            |

**Supplementary Table S2.** Tables of regulated genes identified by transcriptomic analysis related to lipid metabolism (**a**) and differentiation (**b**) processes in the epidermis of Caucasian RS models when compared to the epidermis of African RS models.

**a**

```

1 MTDLLRSVVTVIDVFYKYTKQDGECEGTLKSGELKELLEKELHPVLKNPDDPDTVDVIMHM
61 LDRDHDRRLDFTEFLLMFKLTMACNKVLSKEYCKASGSKKHRRGRHQEEEESETEEDDEE
121 DTPGHKSGYRHSSWSEEGEEHGYSSGHSRGTVKCRHGNSRRLGRQGNLSSSNQEGSQKR
181 YHRSSCGHSWSGGKDRHGSSVELFERINKSHISPSRESGEEYESGSGSNSWERKGGHGL
241 SCGLETSGHESNSTQSRREQKLGSSCSGSDSGRRSHACGYSNSSGCRPNASSSCQS
301 HRFGGQGNQFSYIQSGCQSGIKGGQGHGCVSGGQPSGCGQPENPCSQSYSQRYGAREN
361 GQPQNCGGQWRGTSSQSSCCGQYSGSGSQCNSNGQHEYGSCGRFNSNSSSSNEFSKCDQ
421 SGSSQSTSEFQHTGLSQSSGFEQHVCGSGQTGQHESTSSQSLGYDQHGSSSGKTSFGF
481 QHGSQSGQSSGFGQCGSGGQSSGFGQHGVSQSSGFGQHGVSQSSGFGQHESRSR
541 SSYGQHGSGSSQSSGYGQYGSRETSFGGQHLGSGQSTFGGQYSGSGQSSGFGQHGSGE
601 GQSSGFGQHESRSGQSSYGQHSQSSQSSYGQHGSRQTSFGGQHGSGSSQSTFGGQYGE
661 GSGQSSGFGQHVSGSGQSSGFGQHESRSGHSSYGQHGFGSSQSSYGQHGSSGQTSFGF
721 QHELSSGQSSSFGQHGSGSGQSSGFGQHGSGSGQSSGFGQHESRSGQSSYGQHSQSSQ
781 SGYQHGSRQTSFGGQHGSGSGQSSQSTFGGQYSGSGQSAFGGQHGSGQSSGFGQHESR
841 HQSSYGQHGSGSGQSSYGQHGSSGQTSFGGQHRSSSQYSFGGQHGSGSGQSSGFGQ
901 GTGSQYSGFGQHESRSHQSSYGQHGSGSGQSSYGQHGSSGQSTFGGQHRSGSGQSS
961 FGQHGSGSGQSSGFGQHESGSGKSSGFGQHESRSSQSNYQHGSGSGQSSYGQHGSS
1021 QTTFGQHRSSSQYSFGGQHGSGSDQSSGFGQHGSGSGQSSGFGQYESRRQSSYGQHG
1081 SGSSQSSYGQHGNSQTSFGGQHRPSSGQSSGFGQYSGSGQSSGFGQHGSGTGKSS
1141 FAQHEYRSGQSSYGQHGSGSGQSSGQHESGSGPSTTFGQHVSGDNFSSGQHSDSG
1201 QSTFGQYSGSGQSTGLGQGESQVEGSGTVHGRQETTHGQNTTRHSQSGQSTQT
1261 GSRVTRRRRSQSENSDSEVHSKVSHRHSEHIHQAGSHYPKSGSTVRRRQGTTHGQGD
1321 TTRHGSHGHGQSTQTSRSTGRQRFSHSDATDSEVHSGVSHRPHSQEQTHSQAGSQHC
1381 ESTVHERHETTYQTGEATGHGHSGHGQSTQRGSRTTGRGSGHSESSDSEVHSGGS
1441 QSSEQTHGQAQSQHGSGSTVHGRHGTTHGQTDGTTTRHAHYHHGKSTQRGSSTTGRRGSG
1501 HSESSDSEVHSGGSHTHSGHTHGQSGSQHGESESIHDRHRITHGQTDGTTTRHSYGHEQ
1561 TTQTSRRTGRQRTSHSESTDSEVHSGSHRPHSREHTYQAGSQHEEPEFTVHERHGTT
1621 HGQIGDTTGHSHSGHGQSTQRGSRRTGRQRSSHSESSDSEVHSGVSHHTHTGHGQAG
1681 HGQSESVPERHGTTHTGQTDGTTTRHAHYHHGLTQTGSRTTGRGSGHSEYSDSEGYSGV
1741 SHTHSGHTHGQARSQHGESESVHERHGTHTGQTDGTTTRHAHSGHGQSTQTSRRTGRRS
1801 SGHSEYSDSEGHSGFSQRPHSRGHTHGQAGSQHGESESVDERHGTTHTGQTDGTSGHQ
1861 GHGQSTQSGSSTGRRRSGHSESSDSEVHSGGSHTHSGHTHSQARSQHGESESTVHKRHQ
1921 TTHGQTDGTTTEHGHPSHGQTIQTSRRTGRRGSGHSEYSDSEGSPSVSHTHSGHTHGQAG
1981 SHYPESGSSVHERHGTHTGQADTTRHGSHGHGQSTQRGSRRTGRRASGHSEYSDSEGS
2041 GVSHTHSGHAHGQAQSQHGSGSSVHERHGTHTGQTDGTTTRHAHSGHGQSTQRGSRTAGR
2101 RSGHSESSDSEVHSGVSHTHSGHTYQARSQHGESESAIHGRQGTHTGQTDGTTTRHGQS
2161 GHGQSTQTSRRTGRQRSSHSESSDSEVHSEASPTHSGHTHSQAQSRHGQSSGSHGRQG
2221 TTHGQTDGTTTRHAHYGYGQSTQRGSRRTGRRGSGHSESSDSEVHSGVSHTHSGHIQQAQ
2281 SQQRQPGSTVHGRLETTHTGQTDGTTTRHGSHGYGQSTQTSRSTRASHFQSHSSERQRHGS
2341 SQVWKHGSYGAPEYDGHGTYGPGSGSRKSSISNSHLSWSTDSANKQLSRH

```

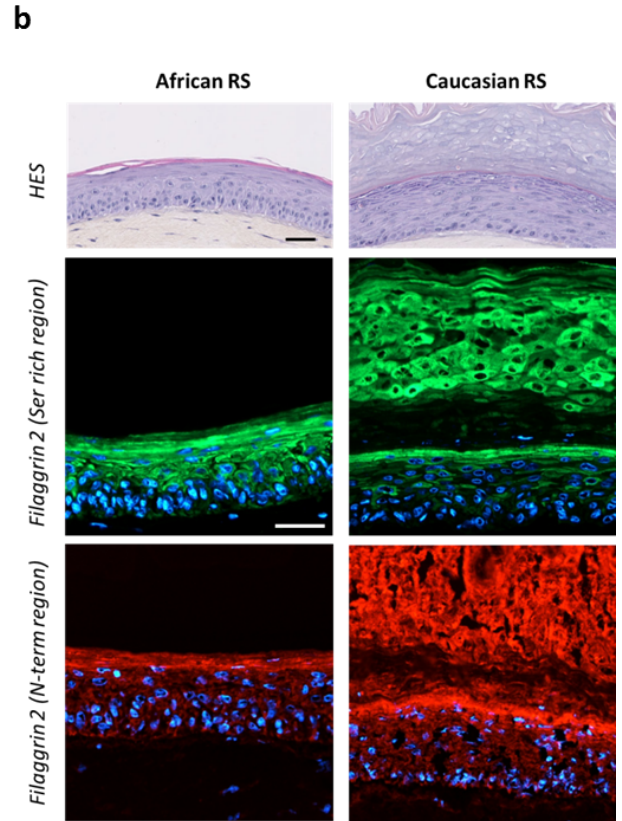

**Supplementary Figure S1. (a)** Identified peptides (in bold) within the filaggrin 2 protein sequence and which were differentially regulated in the epidermis from African A1 and Caucasian C2 RS. Note that peptides have been found in the N terminal, internal and the C terminal domains of filaggrin 2 sequence **(b)** Histology, expression patterns of Ser-rich (green) and N-terminal (red) regions for filaggrin 2 in African A1 and Caucasian C2 *in vitro* epidermis. Nuclei were counterstained with DAPI. Scale bars: 50  $\mu$ m.

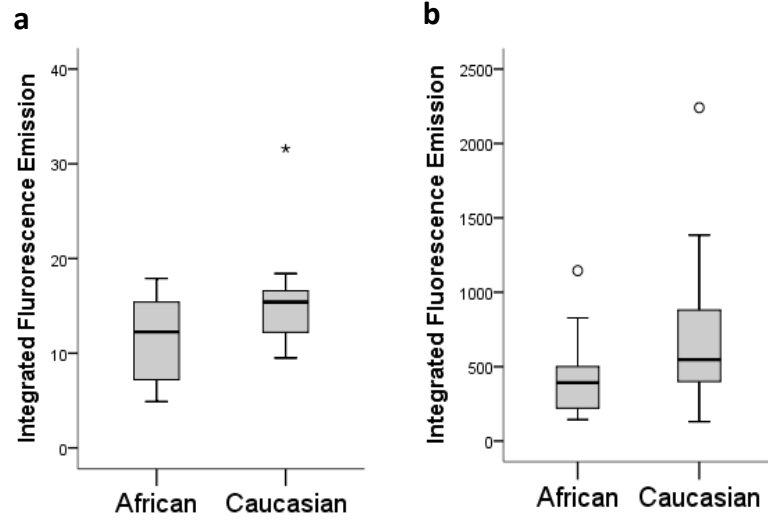

**Supplementary Figure S2. (a)** Quantification of fluorescent detection for Loricrin (a) and Involucrin (b) proteins in epidermis of African and Caucasian human skin (n=10 per skin type).

## Detailed Methods

| African skin type |     | Caucasian skin type |     |
|-------------------|-----|---------------------|-----|
| Donor             | Age | Donor               | Age |
| A1                | 23  | C1                  | 25  |
| A2                | 22  | C2                  | 22  |
| A3                | 26  | C3                  | 25  |
| A4                | 27  | C4                  | 23  |
| A5                | 18  | C5                  | 19  |
| A6                | 25  | C6                  | 19  |
| A7                | 29  | C7                  | 21  |
| A8                | 30  | C8                  | 26  |
| A9                | 30  | C9                  | 29  |
| A10               | 39  | C10                 | 37  |
| A11               | 40  | C11                 | 37  |
| A12               | 42  | C12                 | 42  |

**Supplementary Table S3.** List of skin samples used in this report. Human skin samples were obtained from 18 to 42 years-old female from breast surgery. African and Caucasian skin types were classified as phototype II/III/IV and phototype V/VI. Keratinocytes and papillary fibroblasts have been isolated from skin samples from donors A1 to A4 and C1 to C4.

### Gene expression analysis using microarrays

Overall gene expression of epidermis from RS was performed for four donors per skin type. Each condition was prepared in triplicate experiments. Epidermis was manually separated from dermis and rinsed with buffer before the extraction.

Sample processing was performed at an Affymetrix Service Provider and Core Facility, “KFB - Center of Excellence for Fluorescent Bioanalytics” (Regensburg, Germany; [www.kfb-regensburg.de](http://www.kfb-regensburg.de)).



Total RNA was extracted according to the “Purification of total RNA from animal and human cells” protocol of the RNeasy Mini Kit (Qiagen, Hilden, Germany). In brief, the samples were homogenised in 800 µl RLT buffer using Precellys CK14 ceramic beads (Bertin technology, Montigny-le-Bretonneux, France) for 2 cycles of 20 seconds at 6500 rpm. Samples were centrifuged at 12,000 x g for 3 minutes. One volume of 70 % ethanol was added to the removed supernatant and the mixture was applied to RNeasy Mini spin columns, followed by an on-column DNase digestion and several wash steps. Finally, total RNA was eluted in 30 µl of nuclease free water. Purity and integrity of the RNA was assessed on the Agilent 2100 Bioanalyzer with the RNA 6000 Nano LabChip reagent set (Agilent Techn., Palo Alto, CA, USA).

Sample preparation for microarray hybridization was carried out as described in the Affymetrix GeneChip 3' IVT Express Kit User Manual (Affymetrix Inc., Santa Clara, CA, USA). In brief, 250 ng of total RNA were reverse transcribed into double-stranded copy DNA (cDNA), followed by an *in vitro* transcription generating biotin-labelled amplified RNA (aRNA). The length of the purified aRNA products was assessed using an Agilent 2100 bioanalyzer (Agilent Technologies, Palo Alto, USA). Following fragmentation, 6 µg aRNA were hybridized on Affymetrix Human Genome U133+ PM Array Plates. For hybridization, washing, staining and scanning, the Affymetrix GeneTitan system, controlled by the Affymetrix GeneChip Command Console software v4.2, was used.

Microarray data analyses were performed by AltraBio society (Lyon, France; [www.altrabio.com](http://www.altrabio.com)). The Affymetrix CEL files were analysed using the opensource software R with the Bioconductor suite of statistical packages. Firstly, Raw probe signals were treated with the Robust Multi-chip Analysis (RMA) (Irizarri *et al.*, 2003), consisting on the three following steps: Background Adjustment, Quantile Normalization, and Probe Signal Summarization. For each probe set of each sample, the probe signals were summarised into a

single value using a modified version of release 17.1 of the Entrez-Gene based CDF from The Michigan Center for Biological Information. Then, non-informative genes were filtered using the I/NI algorithm (Talloen W *et al.*, 2007). Mixed linear regression models (Pinheiro J *et al.*, 2013) were applied to identify differentially expressed genes between the different models with a random 'Donor' effect to account for the hierarchical nature of the experimental design. The empirical Bayes method was used to compute moderated *P*-values that were then corrected for multiple comparisons using the Benjamini and Hochberg's false discovery rate (FDR) controlling procedure.

Gene set enrichment analyses based on the hypergeometric distribution applied to the Gene Ontology (Ashburner M *et al.*, 2000) and review of the PubMed database were performed to characterize the differentially expressed genes.

### **Quantitative proteomic analysis**

Stable isotope labelling by amino acids in cell culture (SILAC) was performed to detect differences in synthesized protein amount from the epidermis between African and Caucasian RS models (donor A1 vs donor C2). RS were produced in triplicate experiments per donor. Specifically, RS were cultured in MEM deficient in lysine and arginine (Gibco/ThermoFischer Sc., Waltham MA, USA) supplemented with "heavy" L-Lysine-2HCL, 13C6, 15N and L-Arginine-HCL, 13C6 (ThermoFischer Sc.) for Caucasian skin models or "light" L-Lysine-2HCL and L-Arginine-HCL (ThermoFischer Sc.) for African skin models, NEA, sodium pyruvate, penicillin-streptomycin, amphotericin B, EGF, cholera toxin, hydrocortisone and 10% dialyzed FCS (ThermoFischer Sc.). Proteins were extracted from epidermis after 9 days of emersion phase, with buffer Tris 50mM, 0.3% emipgen and protease inhibitors. Three combinations of proteins from Caucasian and African RS (heavy and light) were analysed together by mass spectrometry. Pooled proteins were digested and fractioned

by reverse-phase HPLC at high pH. Fractions were analysed by LC-MS/MS (5600+ triple TOF, AB Sciex, Ontario, Canada) and each pair of identical peptides was discriminated according to the difference in mass. The ratio of intensity for the paired identical peptides in mass spectra of each pool reflected the difference in amount for each protein between the two conditions. Identification and quantification of proteins were performed using Mascot (Matrix Science) and ProteinPilot 4.5 (AB Sciex). The list of identified proteins was supported with the combined results Mascot and statistics Scaffold tools. Proteins identified by at least 2 peptides or more and with 1% false discovery rate (FDR) were selected and considered to be differentially produced between epidermis of African and Caucasian skin models when differences were observed in a minimum of 2/3 experiments and a ratio with a *P* value <0.05.

Talloe, W. *et al.* I/NI-calls for the exclusion of non-informative genes: a highly effective filtering tool for microarray data. *Bioinformatics* **23**, 2897-2902 (2007).

| <b>Official gene symbol</b> | <b>Probe</b>  |
|-----------------------------|---------------|
| SLC44A5                     | Hs01120485_m1 |
| DHCR24                      | Hs00207388_m1 |
| CERS3                       | Hs00698859_m1 |
| EVOLV3                      | Hs00537016_m1 |
| FAR2                        | Hs00216461_m1 |
| ACER1                       | Hs00370322_m1 |
| ABHD3                       | Hs00370641_m1 |
| POU2F3                      | Hs00205009_m1 |
| BLMH                        | Hs00166071_m1 |
| TGM3                        | Hs00162752_m1 |
| SPINK6                      | Hs02577364_m1 |
| KRT14                       | Hs00265033_m1 |
| FLG                         | Hs00856927_g1 |
| FLG2                        | Hs00418578_m1 |
| GUSB                        | Hs99999908_m1 |
| TBP                         | Hs00427620_m1 |
| YWHAZ                       | Hs03044281_g1 |

**Supplementary Table S4. TaqMan gene expression assays used for real time PCR**
